# Supplementary material for: Characteristics of a Danish Post-COVID Cohort Referred for Examination due to Persistent Symptoms Six Months after Mild Acute COVID-19
Source: J Clin Med. 2022 Dec 10;11(24):7338. doi: 10.3390/jcm11247338 (PMC9783804; doi:10.3390/jcm11247338)
Supplement: Supplementary file 1 [file jcm-11-07338-s001.zip › Figure S1.pdf]

## **Symptom Questionnaire**

**- acute symptoms and post COVID symptoms**

Date \_\_\_\_\_  
 Name (label) \_\_\_\_\_, Personal id \_\_\_\_\_ - \_\_\_\_\_

## Did you experience symptoms when you first discovered you were infected/first fell ill with COVID-19?

Fill in the date of the first COVID-19 symptom   /  /    
 (fill in the month and year if you do not remember the exact date)

| Did you experience the following symptoms                       | X in 1 of 3 boxes        |                          |                          | Duration of symptom in days<br>If you still have the symptom: write "still" | Did have the symptom with the same manifestation <u>before</u> COVID-19 |
|-----------------------------------------------------------------|--------------------------|--------------------------|--------------------------|-----------------------------------------------------------------------------|-------------------------------------------------------------------------|
|                                                                 | Yes                      | No                       | Don't know               |                                                                             |                                                                         |
| Headache                                                        | <input type="checkbox"/> | <input type="checkbox"/> | <input type="checkbox"/> | _____                                                                       | <input type="checkbox"/>                                                |
| Dizziness                                                       | <input type="checkbox"/> | <input type="checkbox"/> | <input type="checkbox"/> | _____                                                                       | <input type="checkbox"/>                                                |
| Numbness/tingling/sleeping/sensation of skin (e.g., hands/feet) | <input type="checkbox"/> | <input type="checkbox"/> | <input type="checkbox"/> | _____                                                                       | <input type="checkbox"/>                                                |
| Impaired smell                                                  | <input type="checkbox"/> | <input type="checkbox"/> | <input type="checkbox"/> | _____                                                                       | <input type="checkbox"/>                                                |
| Impaired taste                                                  | <input type="checkbox"/> | <input type="checkbox"/> | <input type="checkbox"/> | _____                                                                       | <input type="checkbox"/>                                                |
| Confusion/(febrile) delirium                                    | <input type="checkbox"/> | <input type="checkbox"/> | <input type="checkbox"/> | _____                                                                       | <input type="checkbox"/>                                                |
| Dyspnea                                                         | <input type="checkbox"/> | <input type="checkbox"/> | <input type="checkbox"/> | _____                                                                       | <input type="checkbox"/>                                                |
| Cough                                                           | <input type="checkbox"/> | <input type="checkbox"/> | <input type="checkbox"/> | _____                                                                       | <input type="checkbox"/>                                                |
| Expectoration                                                   | <input type="checkbox"/> | <input type="checkbox"/> | <input type="checkbox"/> | _____                                                                       | <input type="checkbox"/>                                                |
| Chest pain                                                      | <input type="checkbox"/> | <input type="checkbox"/> | <input type="checkbox"/> | _____                                                                       | <input type="checkbox"/>                                                |
| Palpitations                                                    | <input type="checkbox"/> | <input type="checkbox"/> | <input type="checkbox"/> | _____                                                                       | <input type="checkbox"/>                                                |
| Runny nose/nasal obstruction                                    | <input type="checkbox"/> | <input type="checkbox"/> | <input type="checkbox"/> | _____                                                                       | <input type="checkbox"/>                                                |
| Sore throat                                                     | <input type="checkbox"/> | <input type="checkbox"/> | <input type="checkbox"/> | _____                                                                       | <input type="checkbox"/>                                                |
| Nausea                                                          | <input type="checkbox"/> | <input type="checkbox"/> | <input type="checkbox"/> | _____                                                                       | <input type="checkbox"/>                                                |
| Abdominal pain                                                  | <input type="checkbox"/> | <input type="checkbox"/> | <input type="checkbox"/> | _____                                                                       | <input type="checkbox"/>                                                |
| Diarrhea                                                        | <input type="checkbox"/> | <input type="checkbox"/> | <input type="checkbox"/> | _____                                                                       | <input type="checkbox"/>                                                |
| Skin rash                                                       | <input type="checkbox"/> | <input type="checkbox"/> | <input type="checkbox"/> | _____                                                                       | <input type="checkbox"/>                                                |
| Itching skin                                                    | <input type="checkbox"/> | <input type="checkbox"/> | <input type="checkbox"/> | _____                                                                       | <input type="checkbox"/>                                                |
| Joint pain                                                      | <input type="checkbox"/> | <input type="checkbox"/> | <input type="checkbox"/> | _____                                                                       | <input type="checkbox"/>                                                |
| Swollen joints                                                  | <input type="checkbox"/> | <input type="checkbox"/> | <input type="checkbox"/> | _____                                                                       | <input type="checkbox"/>                                                |
| Myalgia                                                         | <input type="checkbox"/> | <input type="checkbox"/> | <input type="checkbox"/> | _____                                                                       | <input type="checkbox"/>                                                |
| Physical exhaustion                                             | <input type="checkbox"/> | <input type="checkbox"/> | <input type="checkbox"/> | _____                                                                       | <input type="checkbox"/>                                                |
| Subjective fever                                                | <input type="checkbox"/> | <input type="checkbox"/> | <input type="checkbox"/> | _____                                                                       | <input type="checkbox"/>                                                |
| Weight loss                                                     | <input type="checkbox"/> | <input type="checkbox"/> | <input type="checkbox"/> | _____ kg                                                                    |                                                                         |
| Hospitalization                                                 | <input type="checkbox"/> | <input type="checkbox"/> | <input type="checkbox"/> | _____                                                                       |                                                                         |

Date \_\_\_\_\_  
 Name (label) \_\_\_\_\_, Personal id \_\_\_\_\_ - \_\_\_\_\_

## Symptoms experienced during the last 4 weeks (page 2-3)

|                               | During the past 4 weeks, to what extent have you experienced                      | X in 1 of 5 boxes                                                                                                                                                             |                          |                          |                          |                          | Did experience the symptom with the same manifestation before COVID-19 |  |
|-------------------------------|-----------------------------------------------------------------------------------|-------------------------------------------------------------------------------------------------------------------------------------------------------------------------------|--------------------------|--------------------------|--------------------------|--------------------------|------------------------------------------------------------------------|--|
|                               |                                                                                   | None                                                                                                                                                                          | A little                 | Some                     | A lot                    | Very much                |                                                                        |  |
| Central nervous system senses | Headache                                                                          | <input type="checkbox"/>                                                                                                                                                      | <input type="checkbox"/> | <input type="checkbox"/> | <input type="checkbox"/> | <input type="checkbox"/> | <input type="checkbox"/>                                               |  |
|                               | Dizziness                                                                         | <input type="checkbox"/>                                                                                                                                                      | <input type="checkbox"/> | <input type="checkbox"/> | <input type="checkbox"/> | <input type="checkbox"/> | <input type="checkbox"/>                                               |  |
|                               | Numbness/tingling/sleeping/sensation of skin (e.g. hands/feet)                    | <input type="checkbox"/>                                                                                                                                                      | <input type="checkbox"/> | <input type="checkbox"/> | <input type="checkbox"/> | <input type="checkbox"/> | <input type="checkbox"/>                                               |  |
|                               | Impaired smell                                                                    | <input type="checkbox"/>                                                                                                                                                      | <input type="checkbox"/> | <input type="checkbox"/> | <input type="checkbox"/> | <input type="checkbox"/> | <input type="checkbox"/>                                               |  |
|                               | Impaired taste                                                                    | <input type="checkbox"/>                                                                                                                                                      | <input type="checkbox"/> | <input type="checkbox"/> | <input type="checkbox"/> | <input type="checkbox"/> | <input type="checkbox"/>                                               |  |
| Cognition                     | Difficulty concentrating/problems doing what you usually do mentally              | <input type="checkbox"/>                                                                                                                                                      | <input type="checkbox"/> | <input type="checkbox"/> | <input type="checkbox"/> | <input type="checkbox"/> | <input type="checkbox"/>                                               |  |
|                               | Difficulty remembering things that have just happened                             | <input type="checkbox"/>                                                                                                                                                      | <input type="checkbox"/> | <input type="checkbox"/> | <input type="checkbox"/> | <input type="checkbox"/> | <input type="checkbox"/>                                               |  |
|                               | Difficulty remembering things that happened months or years ago                   | <input type="checkbox"/>                                                                                                                                                      | <input type="checkbox"/> | <input type="checkbox"/> | <input type="checkbox"/> | <input type="checkbox"/> | <input type="checkbox"/>                                               |  |
| Heart and lungs               | Dyspnea at rest                                                                   | <input type="checkbox"/>                                                                                                                                                      | <input type="checkbox"/> | <input type="checkbox"/> | <input type="checkbox"/> | <input type="checkbox"/> | <input type="checkbox"/>                                               |  |
|                               | Dyspnea at physical activity                                                      | <input type="checkbox"/>                                                                                                                                                      | <input type="checkbox"/> | <input type="checkbox"/> | <input type="checkbox"/> | <input type="checkbox"/> | <input type="checkbox"/>                                               |  |
|                               | If yes, (dyspnea):<br><br>Tick 1 next to the activity you experience as the worst | 1: Are you ever troubled by breathlessness except on strenuous exertion? <input type="checkbox"/>                                                                             |                          |                          |                          |                          |                                                                        |  |
|                               |                                                                                   | 2: Are you short of breath when hurrying on the level or walking up a slight hill? <input type="checkbox"/>                                                                   |                          |                          |                          |                          |                                                                        |  |
|                               |                                                                                   | 3: Do you have to walk slower than most people on the level? Do you have to stop after a mile or so (or after ¼ hour) on the level at your own pace? <input type="checkbox"/> |                          |                          |                          |                          |                                                                        |  |
|                               |                                                                                   | 4: Do you have to stop for breath after walking about 100 yds. (or after a few minutes) on the level? <input type="checkbox"/>                                                |                          |                          |                          |                          |                                                                        |  |
|                               |                                                                                   | 5: Are you too breathless to leave the house, or breathless after undressing? <input type="checkbox"/>                                                                        |                          |                          |                          |                          |                                                                        |  |
|                               | Cough                                                                             | <input type="checkbox"/>                                                                                                                                                      | <input type="checkbox"/> | <input type="checkbox"/> | <input type="checkbox"/> | <input type="checkbox"/> | <input type="checkbox"/>                                               |  |
|                               | Expectoration                                                                     | <input type="checkbox"/>                                                                                                                                                      | <input type="checkbox"/> | <input type="checkbox"/> | <input type="checkbox"/> | <input type="checkbox"/> | <input type="checkbox"/>                                               |  |
|                               | Chest pain                                                                        | <input type="checkbox"/>                                                                                                                                                      | <input type="checkbox"/> | <input type="checkbox"/> | <input type="checkbox"/> | <input type="checkbox"/> | <input type="checkbox"/>                                               |  |
|                               | Palpitations                                                                      | <input type="checkbox"/>                                                                                                                                                      | <input type="checkbox"/> | <input type="checkbox"/> | <input type="checkbox"/> | <input type="checkbox"/> | <input type="checkbox"/>                                               |  |
|                               | Runny nose or nasal obstruction                                                   | <input type="checkbox"/>                                                                                                                                                      | <input type="checkbox"/> | <input type="checkbox"/> | <input type="checkbox"/> | <input type="checkbox"/> | <input type="checkbox"/>                                               |  |

Date \_\_\_\_\_  
 Name (label) \_\_\_\_\_, Personal id \_\_\_\_\_ - \_\_\_\_\_

|                  |                                                                      |                              |                             |                                    |                                                |                          |                                                                               |
|------------------|----------------------------------------------------------------------|------------------------------|-----------------------------|------------------------------------|------------------------------------------------|--------------------------|-------------------------------------------------------------------------------|
|                  | Sore throat                                                          | <input type="checkbox"/>     | <input type="checkbox"/>    | <input type="checkbox"/>           | <input type="checkbox"/>                       | <input type="checkbox"/> | <input type="checkbox"/>                                                      |
|                  | <u>During the past 4 weeks</u> , to what extent have you experienced | None                         | A little                    | Some                               | A lot                                          | Very much                | Did experience the symptom with the same manifestation <u>before</u> COVID-19 |
| Abdomen          | Loss of appetite                                                     | <input type="checkbox"/>     | <input type="checkbox"/>    | <input type="checkbox"/>           | <input type="checkbox"/>                       | <input type="checkbox"/> | <input type="checkbox"/>                                                      |
|                  | Nausea                                                               | <input type="checkbox"/>     | <input type="checkbox"/>    | <input type="checkbox"/>           | <input type="checkbox"/>                       | <input type="checkbox"/> | <input type="checkbox"/>                                                      |
|                  | Abdominal pain                                                       | <input type="checkbox"/>     | <input type="checkbox"/>    | <input type="checkbox"/>           | <input type="checkbox"/>                       | <input type="checkbox"/> | <input type="checkbox"/>                                                      |
|                  | Diarrhea                                                             | <input type="checkbox"/>     | <input type="checkbox"/>    | <input type="checkbox"/>           | <input type="checkbox"/>                       | <input type="checkbox"/> | <input type="checkbox"/>                                                      |
|                  | Altered bowel habits                                                 | <input type="checkbox"/>     | <input type="checkbox"/>    | <input type="checkbox"/>           | <input type="checkbox"/>                       | <input type="checkbox"/> | <input type="checkbox"/>                                                      |
|                  | Weight loss after the acute phase of COVID-19                        | _____ kg                     |                             |                                    | Weight loss stopped <input type="checkbox"/>   |                          |                                                                               |
| Infection        | Fever                                                                | Yes <input type="checkbox"/> | No <input type="checkbox"/> | Dont know <input type="checkbox"/> | Number of days with feber (past 4 weeks) _____ |                          |                                                                               |
|                  | <u>During the past 4 weeks</u> , to what extent have you experienced | None                         | A little                    | Some                               | A lot                                          | Very much                | Did experience the symptom with the same manifestation <u>before</u> COVID-19 |
| Skin             | Rash                                                                 | <input type="checkbox"/>     | <input type="checkbox"/>    | <input type="checkbox"/>           | <input type="checkbox"/>                       | <input type="checkbox"/> | <input type="checkbox"/>                                                      |
|                  | Itching                                                              | <input type="checkbox"/>     | <input type="checkbox"/>    | <input type="checkbox"/>           | <input type="checkbox"/>                       | <input type="checkbox"/> | <input type="checkbox"/>                                                      |
| Musculoskeletal  | Joint pain                                                           | <input type="checkbox"/>     | <input type="checkbox"/>    | <input type="checkbox"/>           | <input type="checkbox"/>                       | <input type="checkbox"/> | <input type="checkbox"/>                                                      |
|                  | Swollen joints                                                       | <input type="checkbox"/>     | <input type="checkbox"/>    | <input type="checkbox"/>           | <input type="checkbox"/>                       | <input type="checkbox"/> | <input type="checkbox"/>                                                      |
|                  | Myalgia                                                              | <input type="checkbox"/>     | <input type="checkbox"/>    | <input type="checkbox"/>           | <input type="checkbox"/>                       | <input type="checkbox"/> | <input type="checkbox"/>                                                      |
|                  | Muscle exhaustion                                                    | <input type="checkbox"/>     | <input type="checkbox"/>    | <input type="checkbox"/>           | <input type="checkbox"/>                       | <input type="checkbox"/> | <input type="checkbox"/>                                                      |
| General symptoms | Physical exhaustion                                                  | <input type="checkbox"/>     | <input type="checkbox"/>    | <input type="checkbox"/>           | <input type="checkbox"/>                       | <input type="checkbox"/> | <input type="checkbox"/>                                                      |
|                  | Disturbed sleep                                                      | <input type="checkbox"/>     | <input type="checkbox"/>    | <input type="checkbox"/>           | <input type="checkbox"/>                       | <input type="checkbox"/> | <input type="checkbox"/>                                                      |
|                  | Problems falling asleep                                              | <input type="checkbox"/>     | <input type="checkbox"/>    | <input type="checkbox"/>           | <input type="checkbox"/>                       | <input type="checkbox"/> | <input type="checkbox"/>                                                      |
|                  | Awakening                                                            | <input type="checkbox"/>     | <input type="checkbox"/>    | <input type="checkbox"/>           | <input type="checkbox"/>                       | <input type="checkbox"/> | <input type="checkbox"/>                                                      |

Date \_\_\_\_\_

Name (label) \_\_\_\_\_, Personal id \_\_\_\_\_ - \_\_\_\_\_

| Other symptoms and worst symptom                                                                       |       |
|--------------------------------------------------------------------------------------------------------|-------|
| In association with COVID-19, have you had symptoms that are not mentioned on the previous 3 pages?    | _____ |
| Symptom/problem that is currently most bothersome after COVID-19 (affects your everyday life the most) | _____ |

| Illness and need to contact hospital/doctor                                                                     |                                                          |
|-----------------------------------------------------------------------------------------------------------------|----------------------------------------------------------|
| Admissions to hospital after the acute phase of COVID-19                                                        | Yes <input type="checkbox"/> No <input type="checkbox"/> |
| If yes                                                                                                          | Diagnosis/symptom: _____<br>_____                        |
| Contacts to a doctor after the acute phase of COVID-19 (not the contact that gave rise to the current referral) | Yes <input type="checkbox"/> No <input type="checkbox"/> |
| If yes                                                                                                          | Diagnosis/symptom: _____<br>_____                        |

| Comments                                 |
|------------------------------------------|
| <br><br><br><br><br><br><br><br><br><br> |

Date \_\_\_\_\_  
Name (label) \_\_\_\_\_, Personal id \_\_\_\_\_ - \_\_\_\_\_

## Work

***How is your current work situation do best describe?, or your previous work situation if you are not currently working? (0 or multiple crosses possible)***

- ☐ Employed    ☐ Self-employed    ☐ Voluntary work (unpaid)  
☐ Student    ☐ Stay at home    ☐ Retired    ☐ Newer worked

***Which of the following choices best describe your current work situation?  
(tick 1-2 boxes)***

A. If employed, are you then? ☐ Full time    ☐ Part time    ☐ Partially recovered

B. If not employed, are you then?: ☐ Not working due to your health

☐ Not working due to other reasons: please elaborate: \_\_\_\_\_  
\_\_\_\_\_

If you are not currently working, what date did you stop?    \_\_\_\_/\_\_\_\_/\_\_\_\_

***What is the highest level of education you have completed? (tick 1-2 boxes)***

Primary school

- ☐ Not completed primary school    ☐ Primary school    ☐ High school    ☐ Vocational education  
☐ Medium-cycle higher education    ☐ University    ☐ Master/PhD

***What is your current or most recent job/profession (job title)?***

\_\_\_\_\_
