# Supplementary material for: Characteristics of a Danish Post-COVID Cohort Referred for Examination due to Persistent Symptoms Six Months after Mild Acute COVID-19
Source: J Clin Med. 2022 Dec 10;11(24):7338. doi: 10.3390/jcm11247338 (PMC9783804; doi:10.3390/jcm11247338)
Supplement: Supplementary file 1 [file jcm-11-07338-s001.zip › Table S1.pdf]

## MULTICOV Study Group

| Name                         | Affiliation and title                                                                                                                                                                                                                                                                                            | ORCID                               |
|------------------------------|------------------------------------------------------------------------------------------------------------------------------------------------------------------------------------------------------------------------------------------------------------------------------------------------------------------|-------------------------------------|
| Anders Lehmann Dahl Pedersen | 1. Department of Cardiology, Aarhus University Hospital, Palle Juul-Jensens Boulevard 99, 8200 Aarhus, Denmark:<br>2. Department of Clinical Medicine, Aarhus University, Palle Juul-Jensens Blvd. 82, 8200 Aarhus N, Denmark:                                                                                   | <a href="#">0000-0002-3258-5192</a> |
| Andreas Fløe Hvass           | 1. Department of Respiratory Diseases and Allergy, Aarhus University Hospital, Palle Juul-Jensens Boulevard 99, 8200 Aarhus, Denmark:<br>2. Department of Clinical Medicine, Aarhus University, Palle Juul-Jensens Blvd. 82, 8200 Aarhus N, Denmark:                                                             | <a href="#">0000-0003-2787-0041</a> |
| Benjamin Yamin Ali Khan      | 1. Department of Neurology, Aarhus University Hospital, Palle Juul-Jensens Boulevard 99, 8200 Aarhus, Denmark:<br>2. Department of Clinical Medicine, Aarhus University, Palle Juul-Jensens Blvd. 82, 8200 Aarhus N, Denmark: phd-student                                                                        |                                     |
| Berit Schiøttz-Christensen   | 1. Department of Infectious Diseases, Aarhus University Hospital, Palle Juul-Jensens Boulevard 99, 8200 Aarhus, Denmark: staff specialist.<br>2. Research Unit of General Practice, Department of Public Health, University of Southern Denmark, J.B. Winsløvs Vej 9B, 2nd floor, Odense C - DK-5000: professor. | <a href="#">0000-0003-3866-856</a>  |
| Cagla Cömert                 | 1. Research Unit for Molecular Medicine (MMF), Department of Clinical Medicine, Aarhus University, Palle Juul-Jensens Blvd. 82, 8200 Aarhus N, Denmark:<br>2. Department of Clinical Biochemistry, Aarhus University Hospital, Palle Juul-Jensens Boulevard 99, 8200 Aarhus, Denmark: post.doc                   | <a href="#">0000-0001-9905-3644</a> |
| Christoffer Laustsen         | 1. Department of Radiology, Aarhus University Hospital, Palle Juul-Jensens Boulevard 99, 8200 Aarhus, Denmark: senior consultant.<br>2. The MR Research Centre, Department of Clinical Medicine, Aarhus University, Palle Juul-Jensens Blvd. 82, 8200 Aarhus N, Denmark: professor.                              | <a href="#">0000-0002-0317-2911</a> |
| Elisabeth Bendstrup          | 1. Department of Respiratory Diseases and Allergy, Aarhus University Hospital, Palle Juul-Jensens Boulevard 99, 8200 Aarhus, Denmark: senior consultant.<br>2. Department of Clinical Medicine, Aarhus University, Palle Juul-Jensens Blvd. 82, 8200 Aarhus N, Denmark: professor.                               | <a href="#">0000-0002-4238-6963</a> |

|                        |                                                                                                                                                                                                                                                                                                           |                     |
|------------------------|-----------------------------------------------------------------------------------------------------------------------------------------------------------------------------------------------------------------------------------------------------------------------------------------------------------|---------------------|
| Gregory Wood           | 1. Department of Cardiology, Aarhus University Hospital, Palle Juul-Jensens Boulevard 99, 8200 Aarhus, Denmark:<br>2. Department of Clinical Medicine, Aarhus University, Palle Juul-Jensens Blvd. 82, 8200 Aarhus N, Denmark: phd-student                                                                |                     |
| Hans Erik Bøtker       | Faculty of Health, Aarhus University, Vennelyst Boulevard 4, DK-8000 Aarhus: Vice Dean for Research, professor.                                                                                                                                                                                           | 0000-0001-6358-8962 |
| Hatice Tankisi         | 1. Department of Neurology, Aarhus University Hospital, Palle Juul-Jensens Boulevard 99, 8200 Aarhus, Denmark: senior consultant.<br>2. Department of Clinical Medicine, Aarhus University, Palle Juul-Jensens Blvd. 82, 8200 Aarhus N, Denmark: professor.                                               | 0000-0001-8495-9769 |
| Henning Andersen       | 1. Department of Neurology, Aarhus University Hospital, Palle Juul-Jensens Boulevard 99, 8200 Aarhus, Denmark: senior consultant.<br>2. Department of Clinical Medicine, Aarhus University, Palle Juul-Jensens Blvd. 82, 8200 Aarhus N, Denmark: professor.                                               | 0000-0002-9082-2694 |
| Jane Agergaard         | 1. Department of Infectious Diseases, Aarhus University Hospital, Palle Juul-Jensens Boulevard 99, 8200 Aarhus, Denmark: staff specialist.<br>2. Department of Clinical Medicine, Aarhus University, Palle Juul-Jensens Blvd. 82, 8200 Aarhus N, Denmark: Associate professor.                            |                     |
| Johan Palmfeldt        | 1. Research Unit for Molecular Medicine (MMF), Department of Clinical Medicine, Aarhus University, Palle Juul-Jensens Blvd. 82, 8200 Aarhus N, Denmark: associate professor.<br>2. Department of Clinical Biochemistry, Aarhus University Hospital, Palle Juul-Jensens Boulevard 99, 8200 Aarhus, Denmark | 0000-0001-5585-639X |
| Kristoffer Skaalum     | 1. Department of Infectious Diseases, Aarhus University Hospital, Palle Juul-Jensens Boulevard 99, 8200 Aarhus, Denmark:<br>2. Department of Clinical Medicine, Aarhus University, Palle Juul-Jensens Blvd. 82, 8200 Aarhus N, Denmark: phd-student                                                       | 0000-0002-0902-352X |
| Lars Jørgen Østergaard | 1. Department of Infectious Diseases, Aarhus University Hospital, Palle Juul-Jensens Boulevard 99, 8200 Aarhus, Denmark: chief physician.<br>2. Department of Clinical Medicine, Aarhus University, Palle Juul-Jensens Blvd. 82, 8200 Aarhus N, Denmark: professor.                                       | 0000-0003-2459-0511 |

|                             |                                                                                                                                                                                                                                                                                                            |                     |
|-----------------------------|------------------------------------------------------------------------------------------------------------------------------------------------------------------------------------------------------------------------------------------------------------------------------------------------------------|---------------------|
| Line Vibholm                | 1. Department of Cardiology, Aarhus University Hospital, Palle Juul-Jensens Boulevard 99, 8200 Aarhus, Denmark:<br>2. Department of Clinical Medicine, Aarhus University, Palle Juul-Jensens Blvd. 82, 8200 Aarhus N, Denmark:                                                                             | 0000-0001-8945-1905 |
| Martin Mølhave              | 1. Department of Infectious Diseases, Aarhus University Hospital, Palle Juul-Jensens Boulevard 99, 8200 Aarhus, Denmark:<br>2. Department of Clinical Medicine, Aarhus University, Palle Juul-Jensens Blvd. 82, 8200 Aarhus N, Denmark:                                                                    |                     |
| Rikke Katrine Jentoft Olsen | 1. Research Unit for Molecular Medicine (MMF), Department of Clinical Medicine, Aarhus University, Palle Juul-Jensens Blvd. 82, 8200 Aarhus N, Denmark: associate professor.<br>2. Department of Clinical Biochemistry, Aarhus University Hospital, Palle Juul-Jensens Boulevard 99, 8200 Aarhus, Denmark. | 0000-0003-3470-5589 |
| Sofie Eg Jørgensen          | 1. Department of Infectious Diseases, Aarhus University Hospital, Palle Juul-Jensens Boulevard 99, 8200 Aarhus, Denmark:<br>2. Department of Biomedicine, Aarhus University, Hoegh Guldbergs gade 10, 8000 Aarhus C, Denmark: post.doc                                                                     | 0000-0002-2700-0882 |
| Steen Hvitfeldt Poulsen     | 1. Department of Cardiology, Aarhus University Hospital, Palle Juul-Jensens Boulevard 99, 8200 Aarhus, Denmark: senior consultant.<br>2. Department of Clinical Medicine, Aarhus University, Palle Juul-Jensens Blvd. 82, 8200 Aarhus N, Denmark: professor.                                               | 0000-0002-9586-835X |
| Steffen Leth                | 1. Dep. of Infectious Diseases, Dep. of Internal Medicine, Gødstrup Hospital, Hospitalsparken 15, 7400-Herning, Denmark: Senior Registrar.<br>2. Department of Clinical Medicine, Aarhus University, Palle Juul-Jensens Blvd. 82, 8200 Aarhus N, Denmark: Clinical associate professor.                    | 0000-0003-3194-9844 |
| Søren Sperling Haugen       | 1. Department of Respiratory Diseases and Allergy, Aarhus University Hospital, Palle Juul-Jensens Boulevard 99, 8200 Aarhus, Denmark:<br>2. Department of Clinical Medicine, Aarhus University, Palle Juul-Jensens Blvd. 82, 8200 Aarhus N, Denmark: phd-student                                           | 0000-0001-5700-3948 |
| Thomas Harboe               | 1. Department of Neurology, Aarhus University Hospital, Palle Juul-Jensens Boulevard 99, 8200 Aarhus, Denmark: senior consultant.<br>2. Department of Clinical Medicine, Aarhus University, Palle Juul-Jensens Blvd. 82, 8200 Aarhus N, Denmark: associate professor.                                      |                     |

[illegible]
